# Supplementary material for: Synthesis of Cr and La-codoped SrTiO3nanoparticles for enhanced photocatalytic performance under sunlight irradiation
Source: Royal Society of Chemistry journal article supplement (doi:10.1039/c4cp02963a), 2014-09-17
Supplement: c4cp02963a1.pdf [file c4cp02963a1.pdf]

## Electronic Supplementary Information

### Synthesis of Cr and La-codoped SrTiO<sub>3</sub> Nanoparticles for Enhanced Photocatalytic Performance under Sunlight Irradiation

Surendar Tonda,<sup>a</sup> Santosh Kumar,<sup>a</sup> Oruganti Anjaneyulu,<sup>b</sup> and Vishnu Shanker<sup>a,\*</sup>

<sup>a</sup>Department of Chemistry, National Institute of Technology, Warangal-506004, Telangana, India.

<sup>b</sup>Department of Chemistry, Indian Institute of Technology Delhi, New Delhi-110016, India.

\*Corresponding Author. Tel.: +91-870-2462675; Fax: +91-870-2459547;

E-mail address: [vishnu@nitw.ac.in](mailto:vishnu@nitw.ac.in)

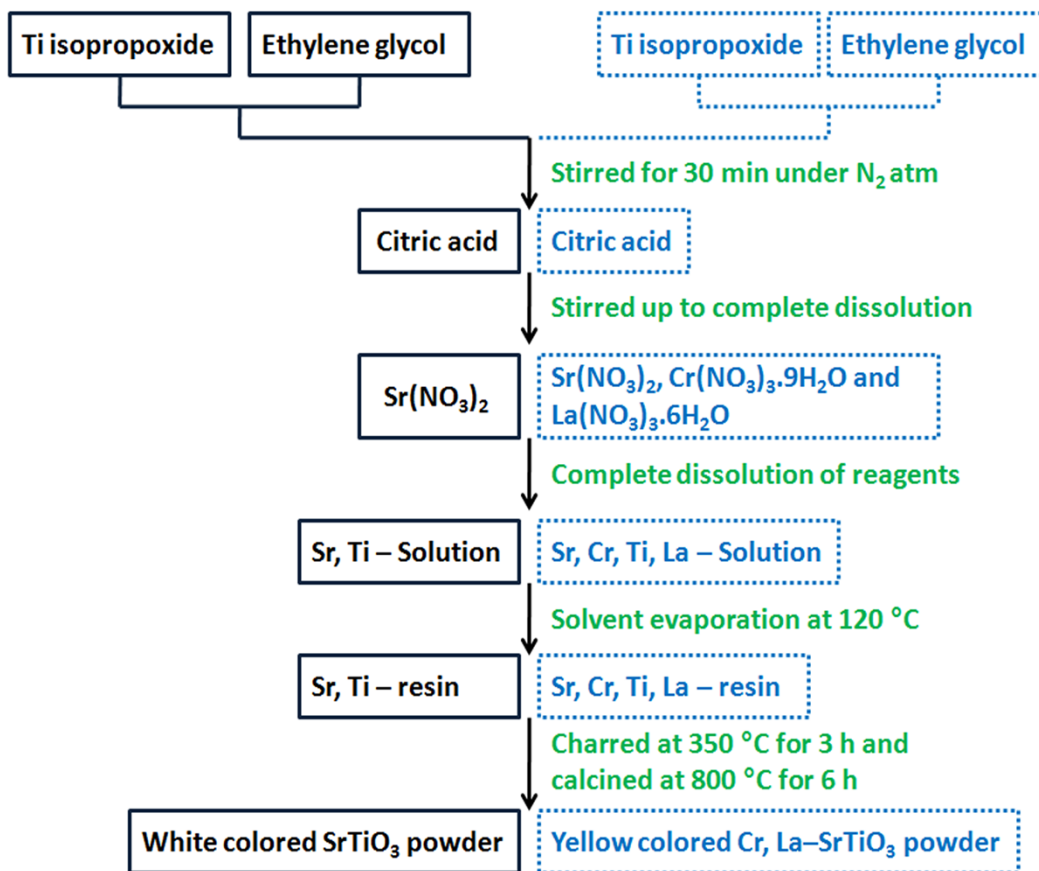

Fig. S1 Flowchart of the synthesis of pure SrTiO<sub>3</sub> and Cr, La-codoped SrTiO<sub>3</sub> samples.

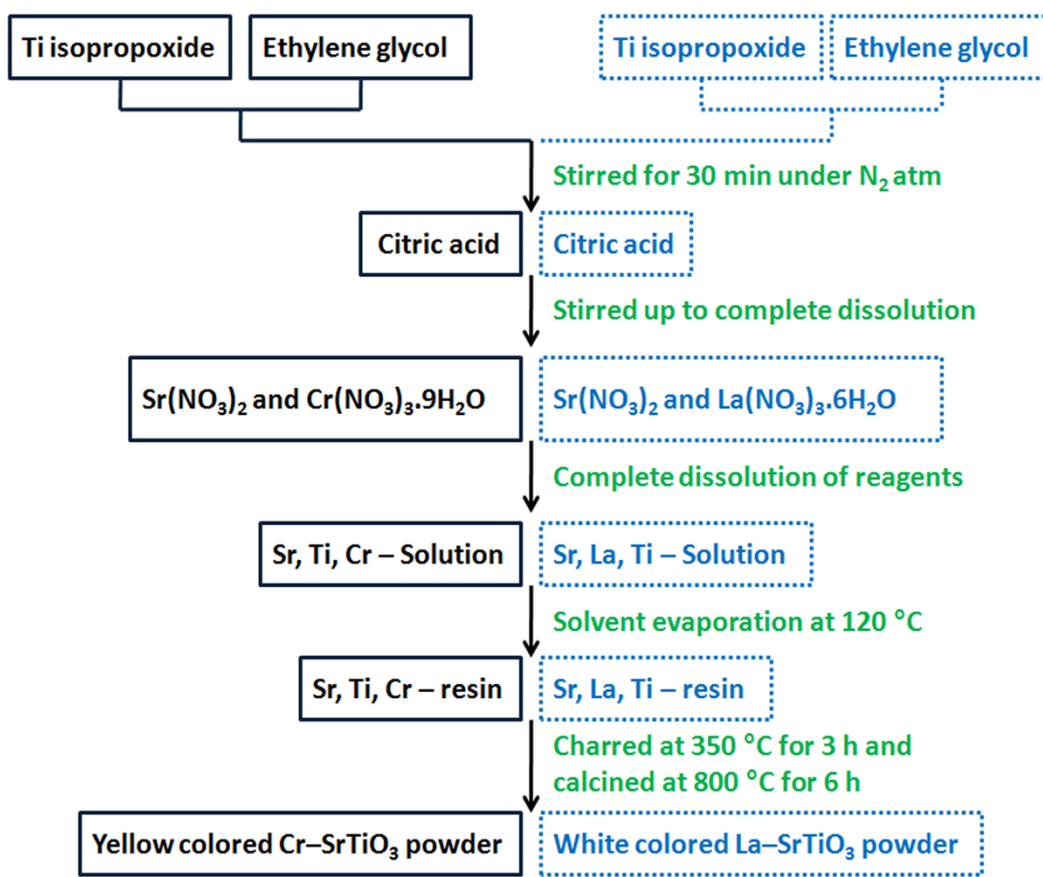

Fig. S2 Flowchart of the synthesis of 1 atom% Cr-doped SrTiO<sub>3</sub> and 1 atom% La-doped SrTiO<sub>3</sub> samples.

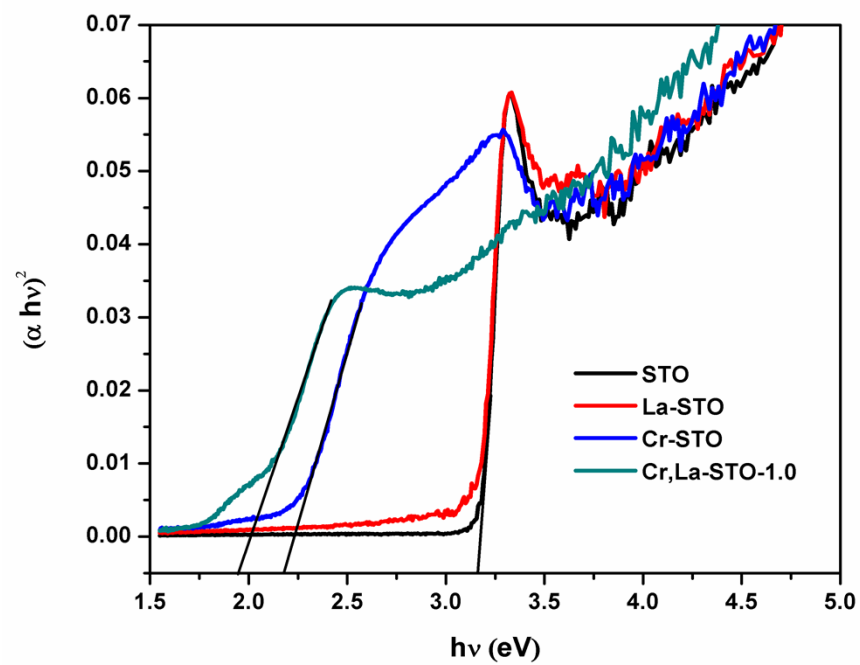

Fig. S3 The plot of transformed Kubelka–Munk function versus the energy of light.

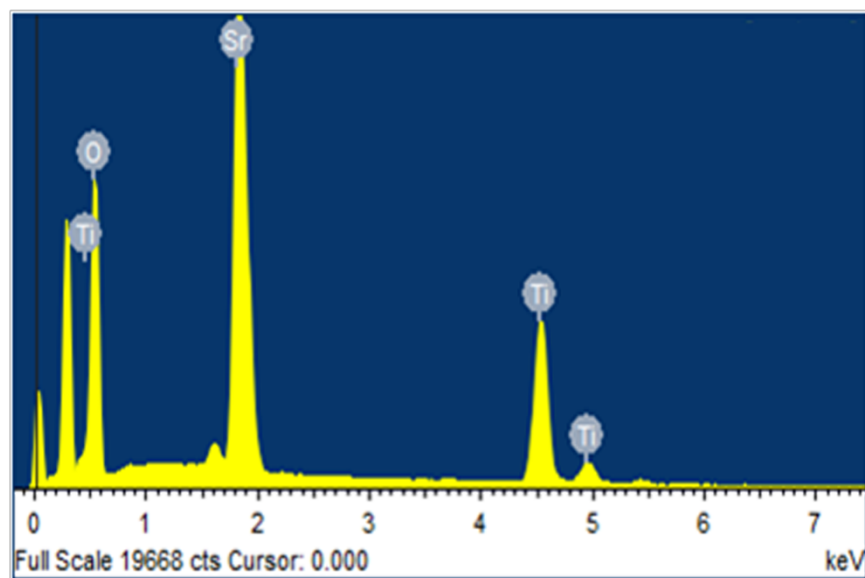

Fig. S4 EDS patterns of the synthesized pure  $\text{SrTiO}_3$  nanoparticles.

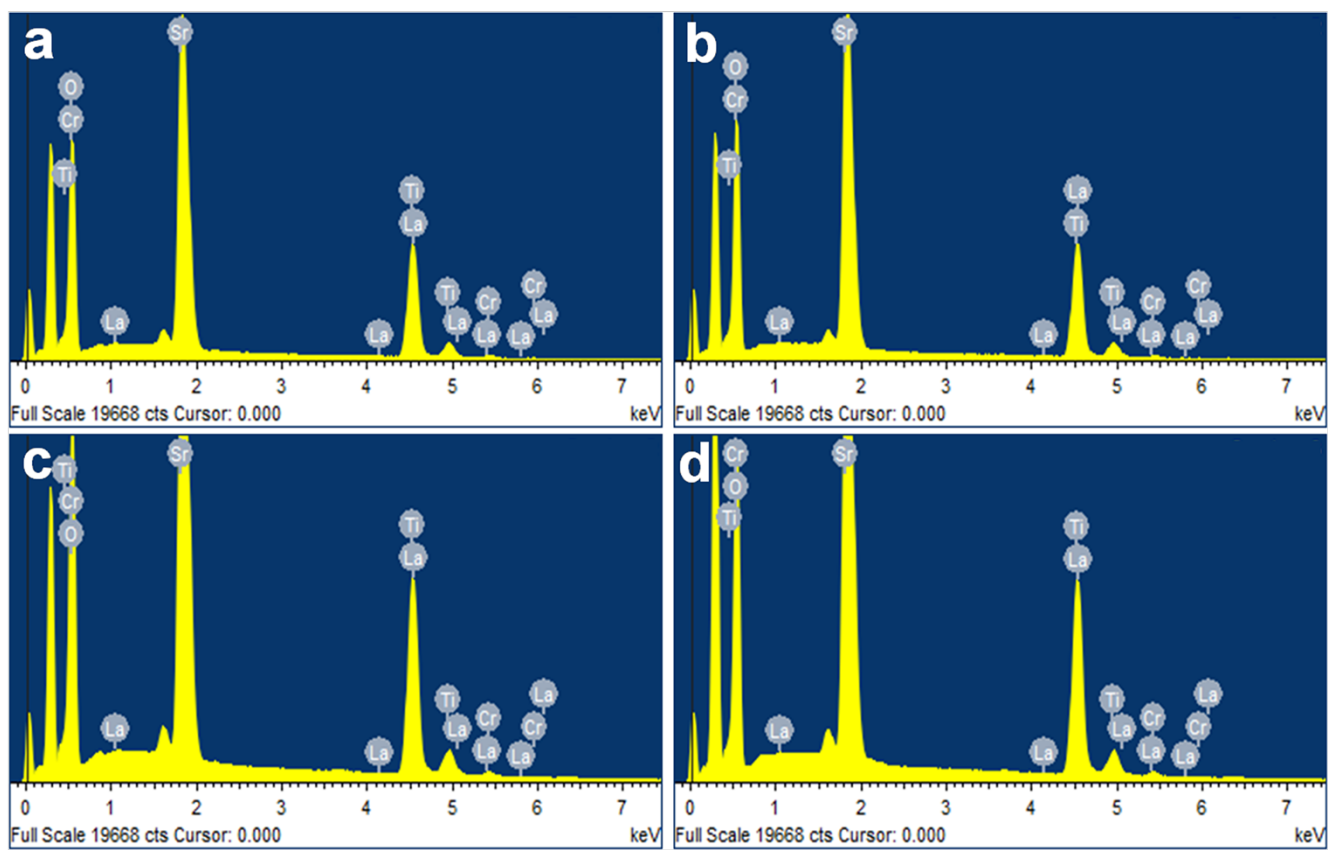

Fig. S5 EDS patterns of the synthesized Cr, La-codoped SrTiO<sub>3</sub> nanoparticles: a) Cr, La-STO-0.5 (b) Cr, La-STO-1.0 (c) Cr, La-STO-1.5 and (d) Cr, La-STO-2.0.

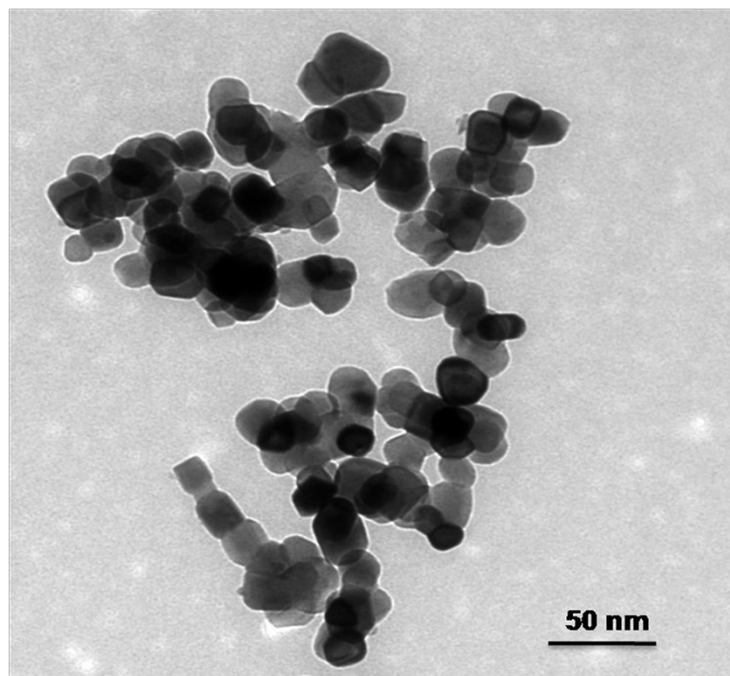

Fig. S6 TEM image of the synthesized pure  $\text{SrTiO}_3$  nanoparticles.

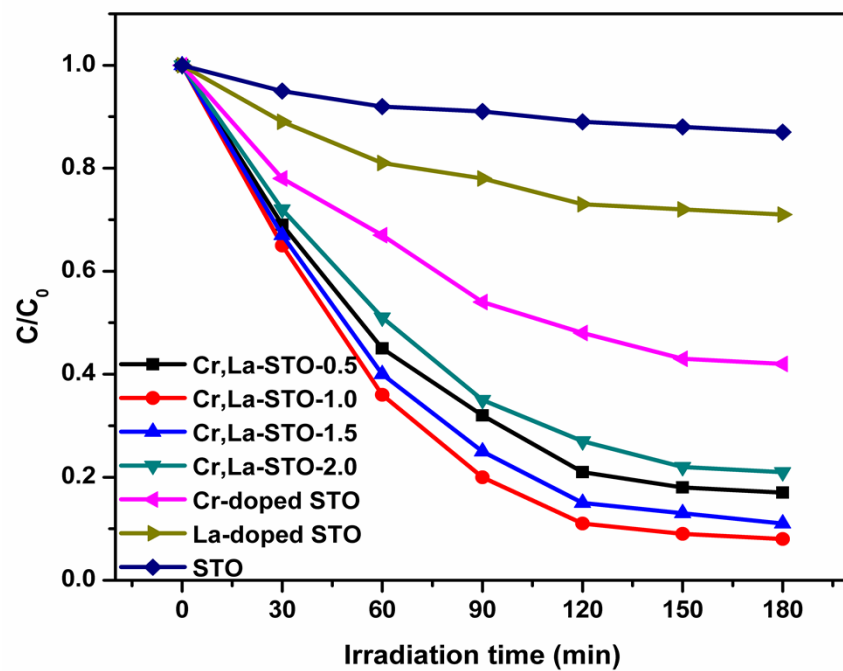

Fig. S7 Comparison of photocatalytic activity for the degradation of RhB in aqueous solution under visible light irradiation over all the synthesized samples.
